# Supplementary material for: Housing Instability and Health Care Engagement Among People With CKD
Source: PubMed Central journal article supplement — Kidney Med. 2020 Mar 16;2(3):367–8. doi: 10.1016/j.xkme.2019.12.009 (PMC7380342; doi:10.1016/j.xkme.2019.12.009), 2020-03-16
Supplement: mmc1.pdf [file mmc1.pdf]

**Table S1.** Associations between postponing medical care and variables in the fully adjusted model for people with CKD.

| <b>Variable</b>                           | <b>Incidence Rate Ratio (95% CI)</b> |
|-------------------------------------------|--------------------------------------|
| Housing instability (yes/no)              | 1.60 (1.21 – 2.12)                   |
| Age                                       | 0.99 (0.97 - 1.01)                   |
| Male sex (ref: female)                    | 1.46 (1.12 - 1.93)                   |
| Black race (ref: white)                   | 1.06 (0.76 - 1.48)                   |
| Below 125% federal poverty level (yes/no) | 1.16 (0.79 - 1.70)                   |
| eGFR                                      | 1.00 (0.99 - 1.01)                   |
| Ln albumin-creatinine ratio               | 1.01 (0.85 - 1.19)                   |
| Diabetes mellitus (yes/no)                | 0.64 (0.46 - 0.90)                   |
| Hypertension (ref: non-hypertensive)      |                                      |
| Pre-hypertension                          | 1.23 (0.93 - 1.63)                   |
| Stage 1 hypertension                      | 1.42 (0.86 - 2.34)                   |
| Stage 2 hypertension                      | 1.23 (0.57 - 2.65)                   |
| Graduated high school (yes/no)            | 0.69 (0.42 - 1.14)                   |
| Food insecurity (yes/no)                  | 1.16 (0.88 - 1.54)                   |
| Health insurance (yes/no)                 | 2.20 (1.39 - 3.50)                   |
| Aware of CKD (yes/no)                     | 0.93 (0.62 - 1.40)                   |

Abbreviations: eGFR – estimated glomerular filtration rate; CKD – chronic kidney disease; CI – confidence interval; ref – reference.

**Table S2.** Association between housing instability and postponement of medical care among people with CKD and without CKD.<sup>1</sup>

| <b>Analysis</b> | <b>CKD</b>                           | <b>Non-CKD</b>                       |
|-----------------|--------------------------------------|--------------------------------------|
|                 | <b>Incidence Rate Ratio (95% CI)</b> | <b>Incidence Rate Ratio (95% CI)</b> |
| Unadjusted      | 1.92 (1.44 – 2.56)                   | 1.61 (1.34 – 1.92)                   |
| Model 1         | 1.73 (1.34 – 2.23)                   | 1.49 (1.21 – 1.84)                   |
| Model 2         | 1.72 (1.36 – 2.18)                   | 1.50 (1.24 – 1.82)                   |
| Model 3         | 1.60 (1.21 – 2.12)                   | 1.34 (1.09 – 1.65)                   |

Model 1: adjusted for demographics (age, race, sex, and poverty level)

Model 2: adjusted demographics and clinical variables (baseline eGFR, log-transformed albumin-creatinine ratio, blood pressure, and diabetes)

Model 3: adjusted for demographics, clinical variables, health insurance, CKD awareness, food insecurity and education level

Abbreviations: eGFR – estimated glomerular filtration rate; CKD – chronic kidney disease; CI – confidence interval.

<sup>1</sup>The interaction between CKD and housing instability was not significant (p for interaction 0.21).
